# Supplementary material for: Antibody-mediated Rejection Without Detectable Donor-specific Antibody Releases Donor-derived Cell-free DNA: Results From the Trifecta Study
Source: PubMed Central journal article supplement — Transplantation. 2023 Feb 21;107(3):709–19. doi: 10.1097/TP.0000000000004324 (PMC9946174; doi:10.1097/tp.0000000000004324), 2023-02-21
Supplement: tp-107-709-s001.pdf [file tp-107-709-s001.pdf]

**Antibody-mediated Rejection Without Detectable Donor-specific Antibody Releases Donor-derived Cell-free DNA: Results From the Trifecta Study**

Philip F. Halloran, MD, PhD, Jeff Reeve, PhD, Katelynn S. Madill-Thomsen, PhD,  
Zachary Demko, PhD, Adam Prewett, MBA, Philippe Gauthier, MD, Paul Billings, MD, PhD, Christopher  
Lawrence, MD, Dave Lowe, PhD, Luis G. Hidalgo, PhD, and the Trifecta Investigators

| <b>Table S1.</b> List of abbreviations and their definitions. |                                                                  |
|---------------------------------------------------------------|------------------------------------------------------------------|
| <b>Abbreviation</b>                                           | <b>Definition</b>                                                |
| %dd-cfDNA                                                     | Percent donor-derived cell-free DNA as a fraction of total cfDNA |
| dd-cfDNA quantity                                             | Copies per ml                                                    |
| AMR                                                           | antibody-mediated rejection                                      |
| AIC                                                           | Aikeke's information criterion                                   |
| ATAGC                                                         | Alberta Transplant Applied Genomics Centre                       |
| AUC                                                           | Area under the curve                                             |
| BK                                                            | Polyoma virus nephropathy                                        |
| cfDNA                                                         | Cell-free DNA                                                    |
| CLIA                                                          | Clinical Laboratory Improvement Amendments                       |
| dd-cfDNA                                                      | Donor-derived cell-free DNA                                      |
| DSA                                                           | Donor-specific antibody                                          |
| EABMR                                                         | Early stage AMR                                                  |
| FABMR                                                         | Fully-developed AMR                                              |
|                                                               |                                                                  |
| IRB                                                           | Institutional review board                                       |
| LABMR                                                         | Late-stage AMR                                                   |
| MMDx                                                          | Molecular Microscope Diagnostic System                           |
| NK cells                                                      | Natural killer cells                                             |
| NRI                                                           | net classification indices                                       |
| OLI                                                           | One Lambda Inc.                                                  |
| PCR                                                           | Polymerase chain reaction                                        |
| PRA                                                           | Panel-reactive antibody                                          |
| PRAHR                                                         | PRA – high risk                                                  |
| SNP                                                           | Single nucleotide polymorphism                                   |
| SOC                                                           | Standard of care                                                 |
| TCMR                                                          | T cell-mediated rejection                                        |
| TxBx                                                          | Time posttransplant                                              |

**Table S2.** Trifecta Study co-authors (N = 280 biopsies): 18 institutions and 41 investigators that have contributed biopsies and cell-free DNA data.

| Investigators                 | Institution                                                         | Location               |
|-------------------------------|---------------------------------------------------------------------|------------------------|
| Justyna Fryc                  | Medical University in Białystok                                     | Białystok, Poland      |
| Beata Naumnik                 |                                                                     |                        |
| Jonathan Bromberg             | University of Maryland School of Medicine                           | Maryland, Baltimore    |
| Matt Weir                     |                                                                     |                        |
| Nadiesda Costa                |                                                                     |                        |
| Milagros Samaniego-Picota     | Henry Ford Transplant Institute                                     | Detroit, Michigan      |
| Iman Francis                  |                                                                     |                        |
| Anita Patel                   |                                                                     |                        |
| Alicja Dębska-Ślizień         | Medical University of Gdańsk                                        | Gdańsk, Poland         |
| Joanna Konopa                 |                                                                     |                        |
| Andrzej Chamienia             |                                                                     |                        |
| Andrzej Więcek                | Medical University of Silesia                                       | Katowice, Poland       |
| Grzegorz Piecha               |                                                                     |                        |
| Željka Veceric-Haler          | University of Ljubljana                                             | Ljubljana, Slovenia    |
| Miha Arnol                    |                                                                     |                        |
| Nika Kojc                     |                                                                     |                        |
| Maciej Glyda                  | Wojewodzki Hospital                                                 | Poznan, Poland         |
| Katarzyna Smykal-Jankowiak    |                                                                     |                        |
| Ondrej Viklicky               | Institute for Clinical and Experimental Medicine (IKEM)             | Prague, Czech Republic |
| Petra Hrubá                   |                                                                     |                        |
| Silvie Rajnochová Bloudíčková |                                                                     |                        |
| Janka Slatinská               |                                                                     |                        |
| Marius Miglinas               | Centre of Nephrology, Vilnius University Hospital Santaros Klinikos | Vilnius, Lithuania     |
| Marek Myślak                  | Pomeranian Medical University                                       | Szczecin, Poland       |
| Joanna Mazurkiewicz           |                                                                     |                        |
| Marta Gryczman                |                                                                     |                        |
| Leszek Domański               | University Hospital n.2, Szczecin                                   |                        |
| Rajendra Baliga               | Tampa General Hospital                                              | Tampa Bay, Florida     |
| Agnieszka Perkowska-Ptasińska | Warsaw Medical University                                           | Warsaw, Poland         |
| Dominika Dęborska-Materkowska |                                                                     |                        |
| Michał Ciszek                 |                                                                     |                        |
| Magdalena Durlik              |                                                                     |                        |
| Leszek Pączek                 |                                                                     |                        |
| Ryszard Grenda                | The Children's Memorial Health Institute                            |                        |
| Miroslaw Banasik              | Medical University of Wrocław                                       | Wrocław, Poland        |
| Mladen Knotek                 | University Hospital Merkur                                          | Zagreb, Croatia        |
| Ksenija Vucur                 |                                                                     |                        |
| Zeljka Jurekovic              |                                                                     |                        |
| Thomas Müller                 | University Hospital Zurich                                          | Zurich, Switzerland    |
| Thomas Schachtner             |                                                                     |                        |
| Andrew Malone                 | Washington University at St. Louis                                  | St. Louis, MO, USA     |
| Tarek Alhamad                 |                                                                     |                        |

**Table S3.** Demographics and clinical features of the Trifecta Study (N = 280) biopsy cohort.

| <b>Biopsy characteristics (N = 280)</b>            |                |
|----------------------------------------------------|----------------|
| <b>Days to biopsy posttransplant</b>               |                |
| <i>Mean</i>                                        | 1353           |
| <i>Median (range)</i>                              | 447 (5-11 504) |
| <b>Days to most recent follow-up after biopsy</b>  |                |
| <i>Mean</i>                                        | 34             |
| <i>Median (range)</i>                              | 6 (0-308)      |
| <b>Indication for biopsy n (%)</b>                 |                |
| <i>For cause</i>                                   | 261 (94)       |
| <i>Surveillance</i>                                | 16 (6)         |
| <i>Missing</i>                                     | 3 (1)          |
| <b>Patient demographics (N = 272)</b>              |                |
| <b>Mean patient age (range)</b>                    | 51 (19-77)     |
| <b>Age &gt; 65 years, count</b>                    | 25             |
| <b>Mean donor age (range)</b>                      | 48 (6-81)      |
| <b>Patient sex</b>                                 |                |
| <i>Male, n (%)</i>                                 | 173 (64)       |
| <i>Female, n (%)</i>                               | 97 (36)        |
| <i>Not available, n (%)</i>                        | 2 (1)          |
| <b>Donor gender</b>                                |                |
| <i>Male, n (%)</i>                                 | 137 (52)       |
| <i>Female, n (%)</i>                               | 126 (48)       |
| <i>Not available, n (%)</i>                        | 9 (3)          |
| <b>Patient ethnicity, n</b>                        |                |
| <i>African American</i>                            | 9              |
| <i>Other</i>                                       | 262            |
| <i>Not available<sup>a</sup></i>                   | 1              |
| <b>Donor type n (% deceased donor transplants)</b> | 200 (75)       |
| <b>Status at last follow-up, n (%)</b>             |                |
| <i>Functioning graft</i>                           | 233 (91)       |
| <i>Graft failure/return to dialysis</i>            | 21 (8)         |
| <i>Patient death with functioning graft</i>        | 3 (1)          |
| <b>Primary disease, n</b>                          |                |
| <i>Diabetic nephropathy (DN)</i>                   | 32             |
| <i>Hypertension / large vessel disease</i>         | 10             |
| <i>Glomerulonephritis / vasculitis (GN)</i>        | 102            |
| <i>Interstitial nephritis / pyelonephritis</i>     | 2              |
| <i>Polycystic kidney disease</i>                   | 0              |
| <i>Others</i>                                      | 76             |
| <i>Unknown etiology</i>                            | 50             |

<sup>a</sup> Some centers preferred not to identify ethnicity.

**Table S4.** Clinical variables and histologic lesion scores in DSA-negative vs DSA-positive MMDx AMR/mixed biopsies (N = 80).

| Variable                 |                                            | Mean value             |                                        |                           | P for DSA-positive vs DSA-negative |
|--------------------------|--------------------------------------------|------------------------|----------------------------------------|---------------------------|------------------------------------|
|                          |                                            | No rejection (N = 164) | DSA-positive AMR <sup>b</sup> (N = 35) | DSA-negative AMR (N = 45) |                                    |
| Clinical                 | Median time of biopsy posttransplant, days | 935                    | 1564                                   | 1608                      | 0.91                               |
|                          | GFR, cc/min                                | 43.34                  | 43.94                                  | 42.01                     | 0.72                               |
|                          | Donor age, years                           | 49.70                  | 40.84                                  | 44.11                     | 0.34                               |
| AMR lesions/features     | g (glomerulitis)                           | 0.22                   | 1.17                                   | 1.32                      | 0.56                               |
|                          | <b>ptc (capillaritis)</b>                  | <b>0.17</b>            | <b>1.69</b>                            | <b>1.14</b>               | <b>0.04</b>                        |
|                          | cg (double contours)                       | 0.17                   | 1.09                                   | 0.95                      | 0.60                               |
|                          | C4d staining <sup>a</sup>                  | 0.13                   | 0.40                                   | 0.30                      | 0.33                               |
| TCMR lesions             | i (interstitial infiltrate)                | 0.01                   | 0.89                                   | 0.93                      | 0.84                               |
|                          | t (tubulitis)                              | 0.51                   | 0.80                                   | 0.93                      | 0.58                               |
| Rejection lesions        | v (vasculitis)                             | 0.08                   | 0.09                                   | 0.22                      | 0.20                               |
| Atrophy-fibrosis-related | ci (fibrosis)                              | 0.99                   | 1.18                                   | 1.14                      | 0.84                               |
|                          | ct (atrophy)                               | 1.08                   | 1.24                                   | 1.37                      | 0.47                               |
|                          | cv (fibrous intimal thickening)            | 1.16                   | 1.00                                   | 1.13                      | 0.60                               |
|                          | ah (hyalinosis)                            | 1.26                   | 1.27                                   | 1.13                      | 0.60                               |

<sup>a</sup> C4d staining is coded as positive = 1, negative = 0. Therefore, the means for this variable indicates the fraction of biopsies that were positive. Missing values were excluded from the calculations.

<sup>b</sup> Includes PRA high-risk (PRAHR) biopsies. Biopsies from PRA-positive patients with missing/unavailable donor phenotyping to assign DSA status were called PRAHR in this study and were analyzed as DSA positive.

AMR, antibody-mediated rejection; DSA, donor-specific antibody; GFR, glomerular filtration rate; MMDx, Molecular Microscope Diagnostic System; PRA, panel-reactive antibody; TCMR, T cell-mediated rejection.
